# Supplementary material for: Efficiency of Emission Control Measures on Particulate Matter-Related Health Impacts and Economic Cost during the 2014 Asia-Pacific Economic Cooperation Meeting in Beijing
Source: MDPI journal article supplement (doi:10.3390/ijerph14010019), 2016-12-28
Supplement: s1 [file s1]

# Supplemental Materials: Efficiency of Emission Control Measures on Particulate Matter Related Health Impacts and Economic Cost during the 2014 Asia-Pacific Economic Cooperation Meeting in Beijing

Qichen Liu, Jing Huang, Bin Guo and Xinbiao Guo

**Table S1.** Characteristics (mean  $\pm$  SD) and comparison of particulate matter in various monitoring sites.

| Air Pollutants,<br>Various Periods     | Urban Sites<br><i>N</i> = 8 <sup>a</sup> | Suburban Sites<br><i>N</i> = 3 <sup>a</sup> | Transportation Sites<br><i>N</i> = 5 <sup>a</sup> | Control Site<br><i>N</i> = 1 <sup>a</sup> | <i>F</i> | <i>p</i>           |
|----------------------------------------|------------------------------------------|---------------------------------------------|---------------------------------------------------|-------------------------------------------|----------|--------------------|
| PM <sub>2.5</sub> (μg/m <sup>3</sup> ) |                                          |                                             |                                                   |                                           |          |                    |
| Total                                  | 113.11 $\pm$ 83.83                       | 95.84 $\pm$ 70.69                           | 136.88 $\pm$ 96.15                                | 99.19 $\pm$ 85.32                         | 1.754    | 0.159              |
| Pre-APEC                               | 123.77 $\pm$ 83.66                       | 113.27 $\pm$ 76.17                          | 157.36 $\pm$ 99.33                                | 123.09 $\pm$ 93.60                        | 0.607    | 0.613              |
| During-APEC                            | 50.56 $\pm$ 33.08                        | 43.74 $\pm$ 28.76                           | 75.73 $\pm$ 26.41                                 | 36.08 $\pm$ 25.24                         | 3.628    | 0.022 <sup>b</sup> |
| Post-APEC                              | 150.56 $\pm$ 88.17                       | 118.48 $\pm$ 70.76                          | 163.45 $\pm$ 110.62                               | 122.83 $\pm$ 86.01                        | 0.756    | 0.524              |
| PM <sub>10</sub> (μg/m <sup>3</sup> )  |                                          |                                             |                                                   |                                           |          |                    |
| Total                                  | 162.28 $\pm$ 96.89                       | 139.48 $\pm$ 81.42                          | 161.42 $\pm$ 112.85                               | 113.67 $\pm$ 87.48                        | 2.038    | 0.111              |
| Pre-APEC                               | 170.04 $\pm$ 85.13                       | 152.02 $\pm$ 76.91                          | 142.10 $\pm$ 77.84                                | 124.36 $\pm$ 84.83                        | 0.689    | 0.564              |
| During-APEC                            | 79.78 $\pm$ 37.14                        | 71.80 $\pm$ 33.27                           | 94.04 $\pm$ 40.69                                 | 49.56 $\pm$ 24.37                         | 2.919    | 0.047 <sup>b</sup> |
| Post-APEC                              | 217.97 $\pm$ 100.02                      | 178.98 $\pm$ 83.14                          | 231.09 $\pm$ 140.98                               | 153.12 $\pm$ 97.04                        | 1.440    | 0.243              |

<sup>a</sup>: representing the total number of monitoring sites of each types; <sup>b</sup>: *p* < 0.05.

**Table S2.** Estimated proportion and numbers of deaths attributed to PM pollution pre, during and post APEC using by AirQ+ software.

| Health Endpoints              | Attributed Proportion (95% CI)       |                         |                         | Attributed Cases (95% CI) |                   |                      | Attributed Cases per 100,000 Population at Risk (95% CI) |                       |                         |
|-------------------------------|--------------------------------------|-------------------------|-------------------------|---------------------------|-------------------|----------------------|----------------------------------------------------------|-----------------------|-------------------------|
|                               | Pre-APEC                             | During-APEC             | Post-APEC               | Pre-APEC                  | During-APEC       | Post-APEC            | Pre-APEC                                                 | During-APEC           | Post-APEC               |
| <b>PM<sub>2.5</sub></b>       |                                      |                         |                         |                           |                   |                      |                                                          |                       |                         |
| Non-accidental deaths         | 4.45% <sup>a</sup><br>(3.65%, 5.25%) | 1.73%<br>(1.41%, 2.04%) | 5.01%<br>(4.1%, 5.90%)  | 12.9<br>(10.6, 15.2)      | 5.0<br>(4.1, 5.9) | 14.5<br>(11.9, 17.1) | 21.92<br>(17.96, 25.84)                                  | 8.49<br>(6.94, 10.04) | 24.63<br>(20.20, 29.02) |
| Cardiovascular disease deaths | 5.14%<br>(3.88%, 6.27%)              | 2.00%<br>(1.50%, 2.44%) | 5.77%<br>(4.36%, 7.03%) | 4.7<br>(3.6, 5.8)         | 1.8<br>(1.4, 2.3) | 5.3<br>(4.0, 6.5)    | 8.05<br>(6.08, 9.81)                                     | 3.12<br>(2.35, 3.82)  | 9.04<br>(6.83, 11.01)   |
| Respiratory disease deaths    | 5.93%<br>(3.54%, 8.37%)              | 2.31%<br>(1.37%, 3.28%) | 6.66%<br>(3.98%, 9.38%) | 2.0<br>(1.2, 2.9)         | 0.8<br>(0.5, 1.1) | 2.3<br>(1.4, 3.2)    | 3.43<br>(2.05, 4.85)                                     | 1.34<br>(0.79, 1.90)  | 3.86<br>(2.30, 5.43)    |
| <b>PM<sub>10</sub></b>        |                                      |                         |                         |                           |                   |                      |                                                          |                       |                         |
| Non-accidental deaths         | 4.44%<br>(3.90%, 4.85%)              | 1.90%<br>(1.67%, 2.08%) | 5.82%<br>(5.11%, 6.35%) | 12.9<br>(11.3, 14.1)      | 5.5<br>(4.8, 6.0) | 16.9<br>(14.8, 18.4) | 21.85<br>(19.17, 23.84)                                  | 9.35<br>(8.19, 10.22) | 28.64<br>(25.15, 31.23) |
| Cardiovascular disease deaths | 5.92%<br>(5.11%, 6.71%)              | 2.54%<br>(2.19%, 2.89%) | 7.74%<br>(6.70%, 8.77%) | 5.5<br>(4.7, 6.2)         | 2.3<br>(2.0, 2.7) | 7.1<br>(6.2, 8.1)    | 9.27<br>(8.01, 10.51)                                    | 3.98<br>(3.43, 4.53)  | 12.12<br>(10.49, 13.73) |
| Respiratory disease deaths    | 4.44%<br>(3.21%, 5.52%)              | 1.90%<br>(1.37%, 2.37%) | 5.82%<br>(4.22%, 7.22%) | 1.5<br>(1.1, 1.9)         | 0.6<br>(0.5, 0.8) | 2.0<br>(1.4, 2.5)    | 2.57<br>(1.86, 3.20)                                     | 1.10<br>(0.79, 1.37)  | 3.37<br>(2.44, 4.18)    |

<sup>a</sup>: mean number and the 95% confidence interval were presented.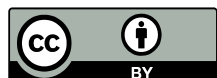

© 2016 by the authors; licensee MDPI, Basel, Switzerland. This article is an open access article distributed under the terms and conditions of the Creative Commons by Attribution (CC-BY) license (<http://creativecommons.org/licenses/by/4.0/>).
